# Supplementary material
Source: Copernicus journal article supplement (doi:10.5194/soil-12-703-2026)
Supplement: Supplementary file 1 [file soil-12-703-2026-supplement.pdf]

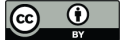

*Supplement of*

## **Electrical conductivity measurements as proxies for diffusion-limited microbial activity in soils under controlled laboratory conditions**

**Orsolya Fülöp et al.**

*Correspondence to:* Naoise Nunan ([naoise.nunan@cnrs.fr](mailto:naoise.nunan@cnrs.fr))

The copyright of individual parts of the supplement might differ from the article licence.

## S1: Experimental design

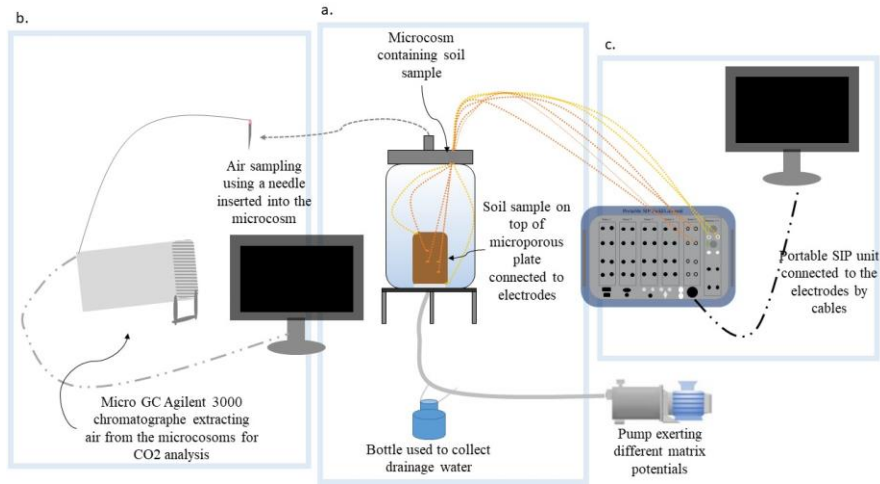

5 **Fig. S1: Experimental set-up used to measure electrical conductivity and soil respiration rate at different matric potentials. (a) Samples are placed on microporous plates inside an air-tightly closed microcosm. The microcosms are connected to a pump that exerts different matric potentials through drainage collecting bottles placed inside an 8°C fridge. (b) Micro GC Agilent 3000 connected to a needle used to directly take 20 ml from the microcosms for CO<sub>2</sub> analysis. (c) Electrical conductivity is measured by a PSIP unit, current injection and potential measurements is performed through electrodes connected to the PSIP unit by cables sealed by silicone at the top of the microcosm.**

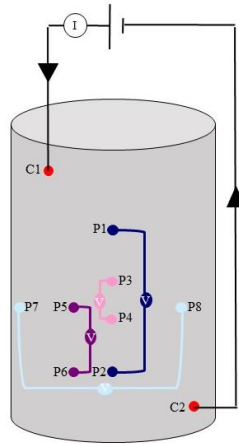

10 **Fig. S2: Sketch of the electrode configuration used for the electrical conductivity measurements: C1 and C2 are the current electrodes (injection), while P1 to P8 are potential electrodes (potential measurements). Measurement pair 1 to 4 correspond to P1-P2, P3-P4, P5-P6, and P7-P8, respectively (see Table S1).**

## S2: Additional results of the paper

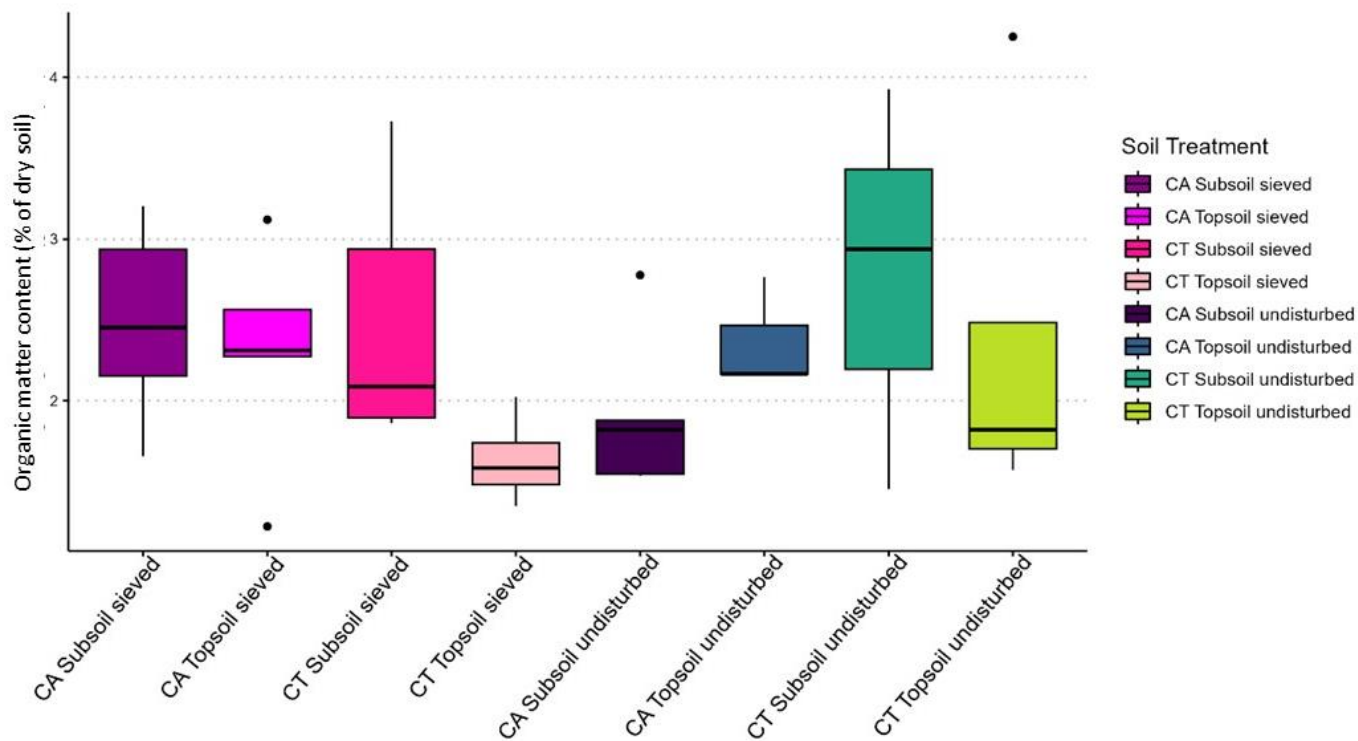

15

**Fig. S3:** Boxplot showing the organic matter content (%) of each study site based on soil treatment. Each soil treatment consists of the triplicate samples with one of the triplicates being tested thrice to allow analytical verification of the laboratory results. CA stands for conservation agriculture while CT stands for conventional tillage. The undisturbed samples are undisturbed soil cores while the sieved samples were sieved down to a 2 mm particle size and packed to a bulk density of  $1.73 \text{ g/cm}^3$ .

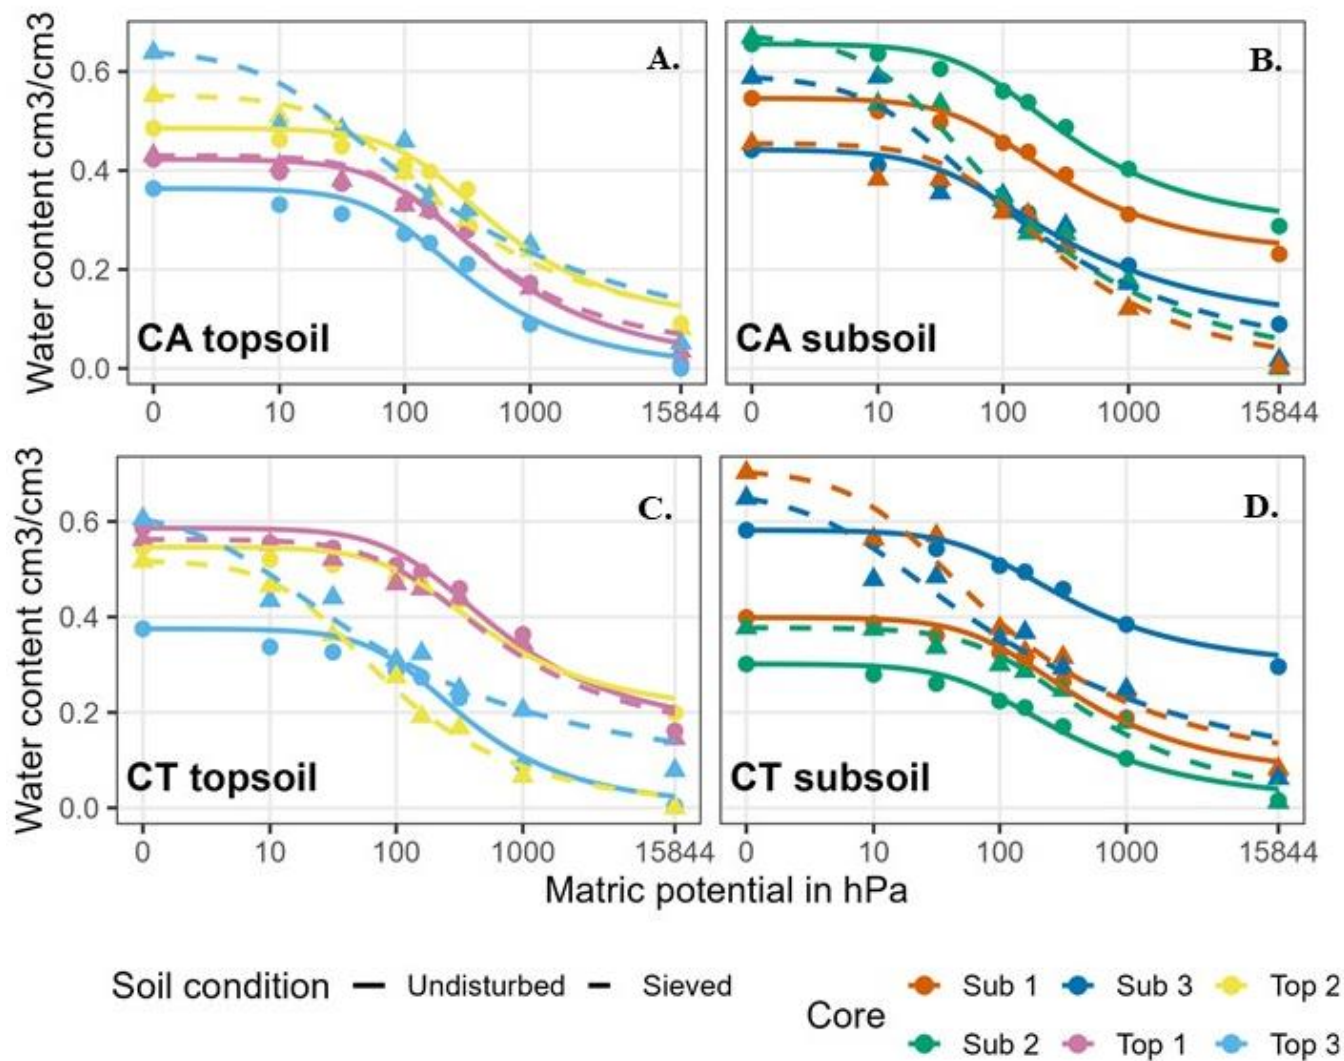

20

Fig. S4: Water retention curves for all soil treatments.

Volumetric water content ( $\text{cm}^3 \text{cm}^{-3}$ ) as a function of matric potential for conservation agriculture (CA) and conventional tillage (CT) soils. Panels show (A) CA topsoil, (B) CA subsoil, (C) CT topsoil, and (D) CT subsoil. Points represent measured values for individual soil cores and lines show fitted van Genuchten retention curves. Solid lines indicate undisturbed samples and dashed lines indicate sieved samples. Colours correspond to individual cores as indicated in the legend.

25

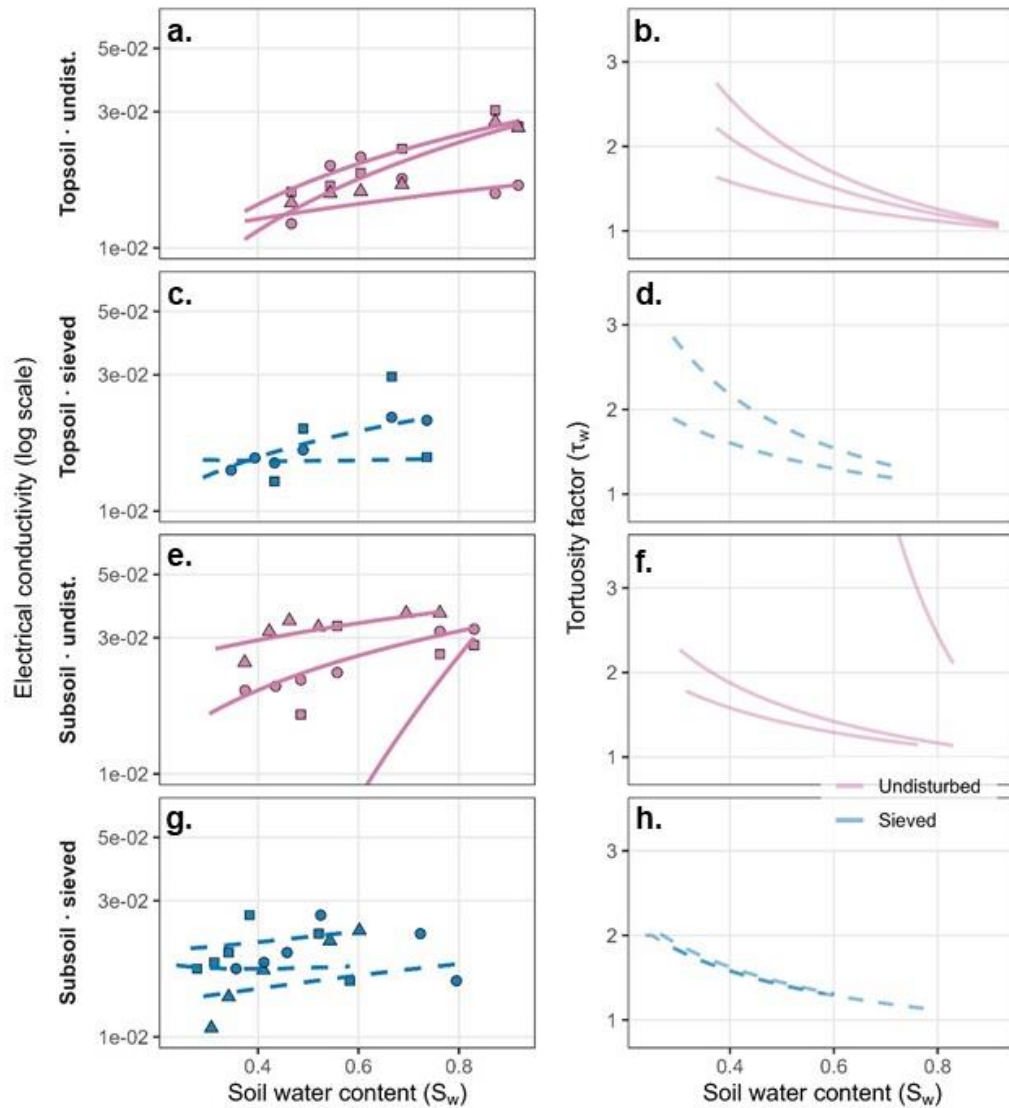

30 Fig. S5: Electrical conductivity and derived tortuosity as a function of water saturation for conservation agriculture (CA) soils.  
 (a, c, e, g) Bulk electrical conductivity (EC) plotted against water saturation ( $S_w$ ) for topsoil and subsoil samples under undisturbed  
 and sieved conditions. EC is shown on a logarithmic scale. Points represent measured values for individual soil cores, and lines  
 represent fits of the pedophysical model (Eq. 4) for each core.  
 (b, d, f, h) Corresponding tortuosity factor ( $\tau_w$ ) derived from EC measurements using Eq. 5. Solid lines indicate undisturbed soils  
 and dashed lines indicate sieved soils.  
 Panels correspond to (a-b) topsoil undisturbed, (c-d) topsoil sieved, (e-f) subsoil undisturbed, and (g-h) subsoil sieved. One replicate  
 35 in the undisturbed subsoil treatment was excluded from the plotted relationship due to unstable electrode contact that produced  
 non-physical EC values approaching zero. The raw measurements are retained in the accompanying dataset for transparency.

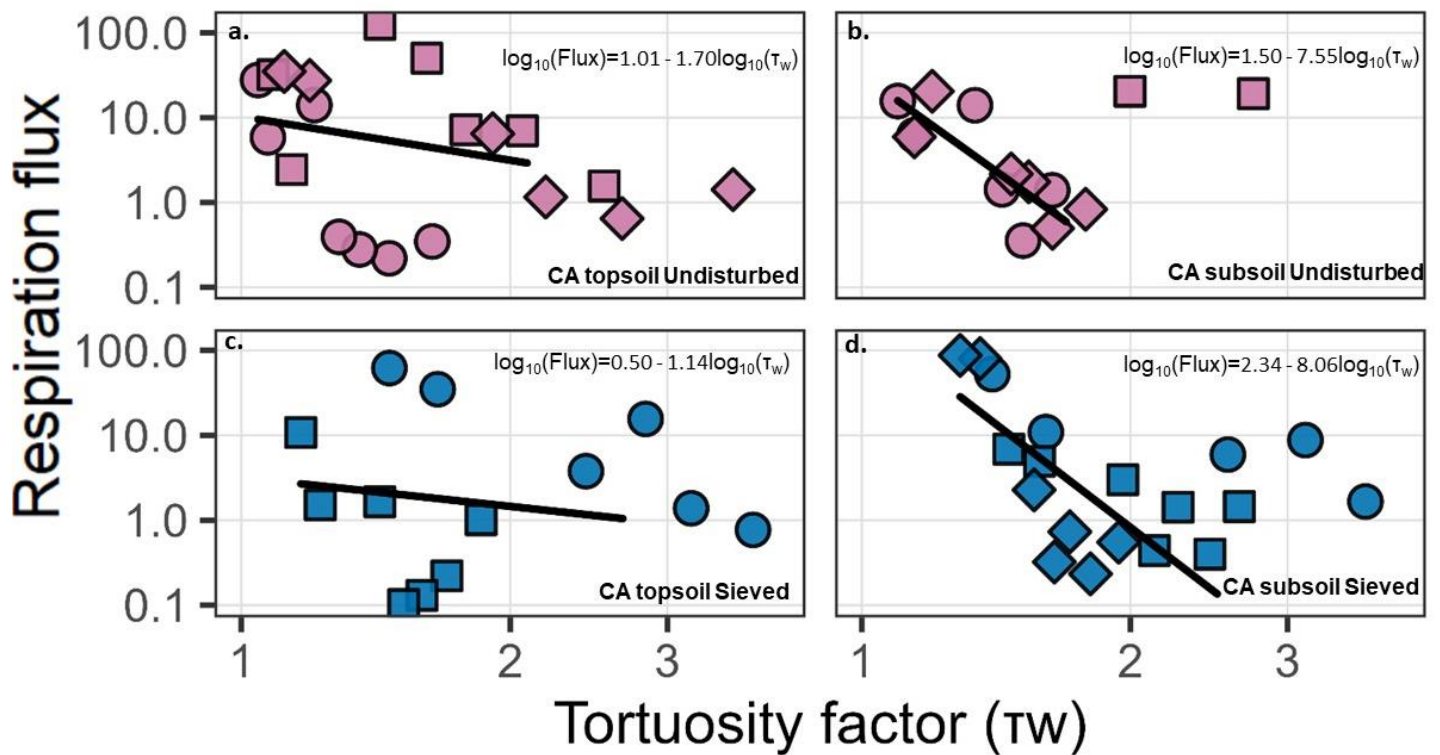

40 **Fig. S6: Relationship between soil respiration flux and EC-derived tortuosity ( $\tau_w$ ) for the conservation agriculture (CA) samples.** Panels (a-b) show undisturbed samples and panels (c-d) show sieved samples. The left column corresponds to topsoil and the right column to subsoil. Points represent individual measurements from soil cores, with symbol shape indicating replicate. Respiration flux is plotted on a logarithmic scale. Solid black lines represent linear regressions fitted between  $\log_{10}$ -transformed respiration flux and  $\log_{10}$ -transformed tortuosity ( $\tau_w$ ) within the diffusion-limited range used for the statistical analysis. Only measurements within this range were included in the regressions. Regression equations are shown in each panel.

45

S3: Supplementary tables used in the article

50 **Table S1:** Table showing the electrode pairs, their names indicated in Figure 3, the distance between the electrodes and the geometric factor calculated for each pair.

| Electrode Pairs | Electrode names | Distance/angle between electrodes | Geometric factor (in m) |
|-----------------|-----------------|-----------------------------------|-------------------------|
| Pair 1          | P1-P2           | 4 cm, vertical                    | 0.060                   |
| Pair 2          | P3-P4           | 1 cm, vertical                    | 0.199                   |
| Pair 3          | P5-P6           | 2 cm, vertical                    | 0.199                   |
| Pair 4          | P7-P8           | 45°, horizontal                   | 0.284                   |

**Table S2:** Average net respiration flux (in  $\mu\text{mol}/\text{hour}/\text{grams}$  of organic matter) at the highest measured saturation of -70hPa. CT stands for conventional tillage and CA stands for conservation agriculture. The sieved samples were sieved down to a 2 mm particle size and packed to a bulk density of  $1.73 \text{ g}/\text{cm}^3$ .

| Soil Treatment         | Mean Flux | Standard error of mean |
|------------------------|-----------|------------------------|
| CA Subsoil undisturbed | 13.98     | 4.25                   |
| CT Subsoil undisturbed | 7.38      | 4.75                   |
| CA Topsoil undisturbed | 31.55     | 2.12                   |
| CT Topsoil undisturbed | 19.46     | 1.79                   |
| CA Subsoil sieved      | 47.17     | 40.29                  |
| CT Subsoil sieved      | 88.14     | 52.700                 |
| CA Topsoil sieved      | 36.34     | 25.54                  |
| CT Topsoil sieved      | 32.42     | 0.14                   |

55 **Table S3:** Average relative respiration flux and standard error of the mean relative respiration of each soil treatment type. The data was normalized to the values at -70hPa and is graphically represented in Fig.1 of the main body of the article. CT stands for conventional tillage and CA stands for conservation agriculture.

| Treatment  | Soil structure | Applied suction | Average respiration | Standard error of the mean |
|------------|----------------|-----------------|---------------------|----------------------------|
| CA Subsoil | Sieved         | -70             | 1                   | 0                          |
| CA Subsoil | Sieved         | -100            | 6.184               | 5.466                      |
| CA Subsoil | Sieved         | -250            | 0.400               | 0.035                      |
| CA Subsoil | Sieved         | -350            | 0.055               | 0.009                      |

|               |             |      |       |       |
|---------------|-------------|------|-------|-------|
| CA<br>Subsoil | sieved      | -450 | 0.157 | 0.050 |
| CA<br>Subsoil | sieved      | -630 | 0.046 | 0.012 |
| CA<br>Subsoil | sieved      | -996 | 0.145 | 0.065 |
| CA<br>Subsoil | undisturbed | -70  | 1     | 0     |
| CA<br>Subsoil | undisturbed | -100 | 0.975 | 0.291 |
| CA<br>Subsoil | undisturbed | -250 | 0.609 | 0.283 |
| CA<br>Subsoil | undisturbed | -350 | 0.100 | 0.020 |
| CA<br>Subsoil | undisturbed | -450 | 0.065 | 0.026 |
| CA<br>Subsoil | undisturbed | -630 | 0.049 | 0.020 |
| CA<br>Subsoil | undisturbed | -996 | 0.031 | 0.018 |
| CA<br>Topsoil | sieved      | -70  | 1     | 0     |
| CA<br>Topsoil | sieved      | -100 | 2.647 | 2.426 |
| CA<br>Topsoil | sieved      | -250 | 0.550 | 0.001 |
| CA<br>Topsoil | sieved      | -350 | 1.140 | 1.126 |
| CA<br>Topsoil | sieved      | -450 | 0.110 | 0.091 |
| CA<br>Topsoil | sieved      | -630 | 0.072 | 0.039 |
| CA<br>Topsoil | sieved      | -996 | 0.147 | 0.001 |
| CA<br>Topsoil | undisturbed | -70  | 1     | 0     |
| CA<br>Topsoil | undisturbed | -100 | 0.759 | 0.498 |
| CA<br>Topsoil | undisturbed | -250 | 4.452 | 3.556 |
| CA<br>Topsoil | undisturbed | -350 | 1.212 | 0.100 |

|               |             |      |       |        |
|---------------|-------------|------|-------|--------|
| CA<br>Topsoil | undisturbed | -450 | 0.184 | 0.139  |
| CA<br>Topsoil | undisturbed | -630 | 0.167 | 0.1340 |
| CA<br>Topsoil | undisturbed | -996 | 0.071 | 0.024  |
| CT<br>Subsoil | Sieved      | -70  | 1     | 0      |
| CT<br>Subsoil | Sieved      | -100 | 5.977 | 1.498  |
| CT<br>Subsoil | Sieved      | -250 | 2.368 | 1.964  |
| CT<br>Subsoil | Sieved      | -350 | 2.267 | 1.569  |
| CT<br>Subsoil | Sieved      | -450 | 0.137 | 0.048  |
| CT<br>Subsoil | Sieved      | -630 | 0.137 | 0.106  |
| CT<br>Subsoil | Sieved      | -996 | 0.161 | 0.078  |
| CT<br>Subsoil | undisturbed | -70  | 1     | 0      |
| CT<br>Subsoil | undisturbed | -100 | 0.256 | 0.072  |
| CT<br>Subsoil | undisturbed | -250 | 0.362 | 0.092  |
| CT<br>Subsoil | undisturbed | -350 | 0.073 | 0.020  |
| CT<br>Subsoil | undisturbed | -450 | 0.060 | 0.014  |
| CT<br>Subsoil | undisturbed | -630 | 0.024 | 0.010  |
| CT<br>Subsoil | undisturbed | -996 | 0.040 | 0.015  |
| CT<br>Topsoil | Sieved      | -70  | 1     | 0      |
| CT<br>Topsoil | Sieved      | -100 | 1.039 | 0.724  |
| CT<br>Topsoil | Sieved      | -250 | 0.502 | 0.134  |
| CT<br>Topsoil | Sieved      | -350 | 0.077 | 0.060  |

|               |             |      |       |       |
|---------------|-------------|------|-------|-------|
| CT<br>Topsoil | sieved      | -450 | 0.056 | 0.002 |
| CT<br>Topsoil | sieved      | -630 | 0.046 | 0.013 |
| CT<br>Topsoil | sieved      | -996 | 0.081 | 0.006 |
| CT<br>Topsoil | undisturbed | -70  | 1     | 0     |
| CT<br>Topsoil | undisturbed | -100 | 0.368 | 0.176 |
| CT<br>Topsoil | undisturbed | -250 | 1.235 | 1.133 |
| CT<br>Topsoil | undisturbed | -350 | 0.204 | 0.164 |
| CT<br>Topsoil | undisturbed | -450 | 0.100 | 0.024 |
| CT<br>Topsoil | undisturbed | -630 | 0.040 | 0.014 |
| CT<br>Topsoil | undisturbed | -996 | 0.017 | 0.008 |

60 **Table S4: Ionic conductivity of drained pore water measured at the end of the experiment for each soil treatment. These values were used as estimates of pore water conductivity ( $\sigma_w$ ) in the pedophysical model described in Eq. (4).**

| Soil Treatment | Soil structure | Mean    | Standard error of mean |
|----------------|----------------|---------|------------------------|
| CA<br>Topsoil  | undisturbed    | 637.33  | 12.41                  |
| CA<br>Subsoil  | undisturbed    | 463.67  | 22.51                  |
| CT<br>Topsoil  | undisturbed    | 433.00  | 15.57                  |
| CT<br>Subsoil  | undisturbed    | 413.67  | 38.89                  |
| CA<br>Topsoil  | sieved         | 481.00  | 58.24                  |
| CA<br>Subsoil  | sieved         | 597.67  | 48.90                  |
| CT<br>Topsoil  | sieved         | 1052.33 | 8.69                   |

|               |        |        |       |
|---------------|--------|--------|-------|
| CT<br>Subsoil | sieved | 742.33 | 28.67 |
|---------------|--------|--------|-------|

65 **Table S5: Parameters obtained from fitting the pedophysical model relating bulk electrical conductivity to water saturation (Eq. 4) for each soil core using Channel 3 measurements. The formation factor ( $F$ ) and the saturation exponent ( $n$ ) describe how electrical conductivity varies with water saturation. These parameters were used to calculate the tortuosity factor ( $\tau_n$ ) following Eq. (5). RMSE represents the root mean square error of the model fit. One CT undisturbed topsoil replicate showed an unusually steep decline in electrical conductivity with decreasing saturation, resulting in a large fitted exponent; this replicate is retained for transparency.**

| Management | Depth   | Structure   | Core      | $\sigma_0$ | $n$    | RMSE       |
|------------|---------|-------------|-----------|------------|--------|------------|
| CA         | subsoil | sieved      | Subsoil 1 | 2.47       | 0.27   | 6.15E-09   |
| CA         | subsoil | sieved      | Subsoil 2 | 0.878      | 0.286  | 9.87E-10   |
| CA         | subsoil | undisturbed | Subsoil 1 | 4.333      | 1.292  | 0.061      |
| CA         | subsoil | undisturbed | Subsoil 2 | 0.374      | 5.528  | 2.30E-08   |
| CA         | subsoil | undisturbed | Subsoil 3 | 1.133      | 0.368  | 1.60E-08   |
| CA         | topsoil | sieved      | Topsoil 1 | 2          | 1.21   | 0.0194     |
| CA         | topsoil | sieved      | Topsoil 2 | 0.132      | 3.314  | 0.007725   |
| CA         | topsoil | undisturbed | Topsoil 2 | 5.857      | 1.714  | 0.0813     |
| CA         | topsoil | undisturbed | Topsoil 3 | 3.192      | 1.811  | 0.0409     |
| CT         | subsoil | sieved      | Subsoil 1 | 1.751      | 0.706  | 2.35E-09   |
| CT         | subsoil | sieved      | Subsoil 2 | 0.743      | 0.706  | 4.97E-09   |
| CT         | subsoil | sieved      | Subsoil 3 | 3.148      | 1.039  | 0.016480   |
| CT         | subsoil | undisturbed | Subsoil 1 | 1.75       | 0.222  | 0.0194     |
| CT         | subsoil | undisturbed | Subsoil 2 | 0.967      | 2.761  | 3.34E-08   |
| CT         | subsoil | undisturbed | Subsoil 3 | 2.165      | 0.348  | 1.25E-07   |
| CT         | topsoil | sieved      | Topsoil 1 | 35.178     | 3.173  | 0.0133     |
| CT         | topsoil | sieved      | Topsoil 2 | 10.99      | 2.762  | 2.86E-0985 |
| CT         | topsoil | sieved      | Topsoil 3 | 5.984      | 0.718  | 1.81E-08   |
| CT         | topsoil | undisturbed | Topsoil 1 | 0.338      | 16.866 | 4.38E-06   |
| CT         | topsoil | undisturbed | Topsoil 2 | 2.984      | 1.401  | 0.0255     |
| CT         | topsoil | undisturbed | Topsoil 3 | 0.357      | 2.685  | 0.0307     |

95 **Table S6: Regression parameters describing the relationship between soil respiration flux and EC-derived tortuosity ( $\tau_w$ ). Linear regressions were fitted between  $\log_{10}$ -transformed respiration flux and  $\log_{10}$ -transformed tortuosity using individual measurements from soil cores within the diffusion-limited range of water saturation. The table reports the intercept ( $a$ ), slope ( $b$ ), coefficient of determination ( $R^2$ ) and number of observations ( $n$ ) for each depth–structure combination.**

| Management | Depth   | Structure   | Intercept | Slope  | $R^2$ | n  |
|------------|---------|-------------|-----------|--------|-------|----|
| CT         | topsoil | undisturbed | 1.34      | -9.35  | 0.343 | 13 |
| CT         | subsoil | undisturbed | 0.885     | -7.36  | 0.329 | 13 |
| CT         | topsoil | sieved      | 1.97      | -6.33  | 0.283 | 16 |
| CT         | subsoil | sieved      | 2.7       | -8.14  | 0.318 | 17 |
| CA         | topsoil | undisturbed | 1.01      | -1.70  | 0.034 | 16 |
| CA         | subsoil | undisturbed | 1.5       | -7.55  | 0.672 | 11 |
| CA         | topsoil | sieved      | 0.505     | -1.136 | 0.011 | 10 |
| CA         | subsoil | sieved      | 2.34      | -8.06  | 0.577 | 15 |
